# Supplementary material for: Concurrent Label-Free Mass Spectrometric Analysis of Dystrophin Isoform Dp427 and the Myofibrosis Marker Collagen in Crude Extracts from mdx-4cv Skeletal Muscles
Source: PubMed Central journal article supplement (PMC5217383; doi:10.3390/proteomes3030298), 2015-09-16
Supplement: proteomes-03-00298-s001.pdf [file proteomes-03-00298-s001.pdf]

## Supplementary Materials

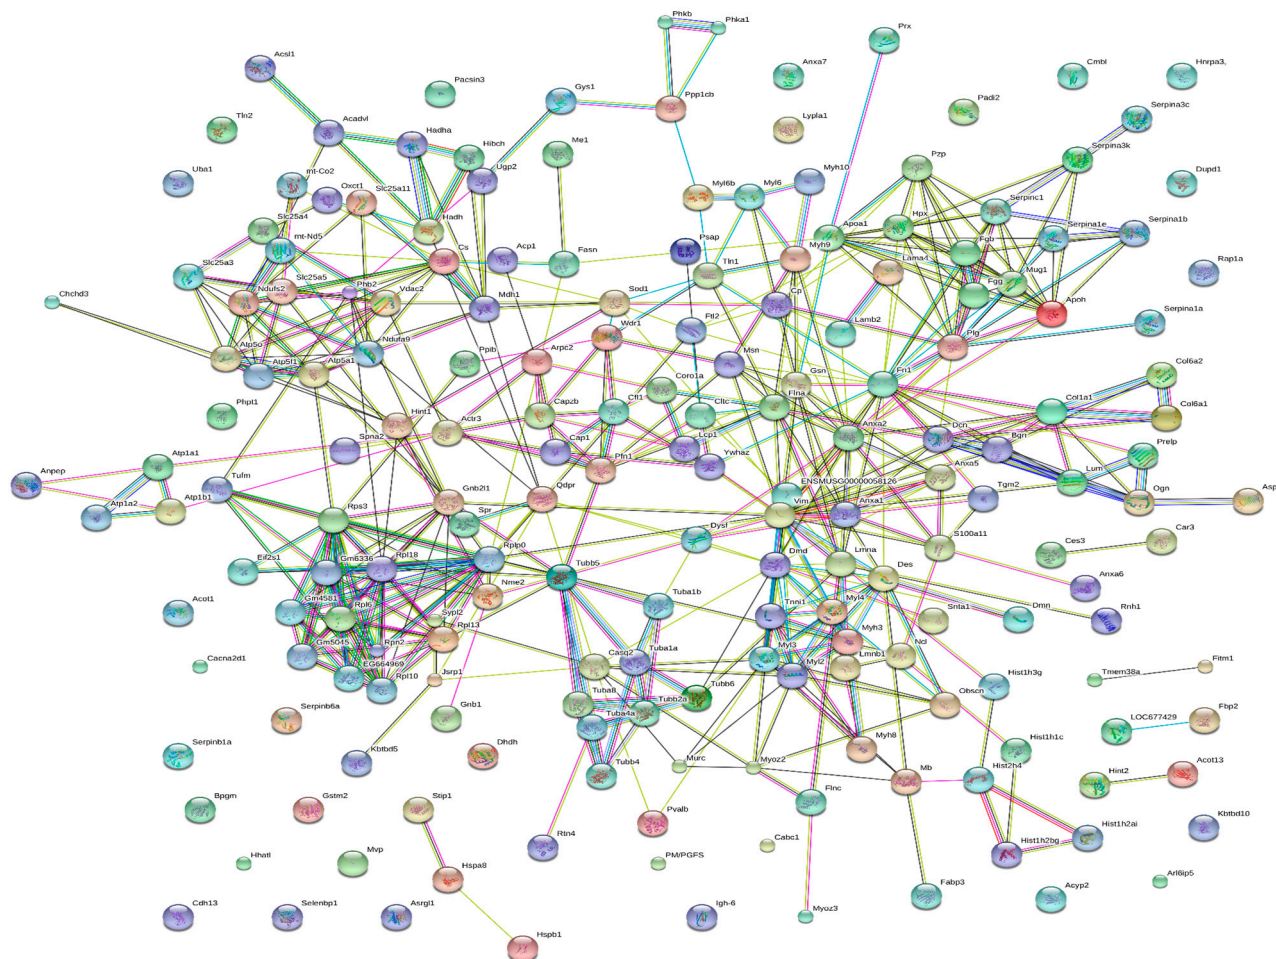

**Figure S1.** Bioinformatics evaluation of dystrophin isoform Dp427 and its central position in the molecular pathogenesis of X-linked muscular dystrophy. In order to generate a protein interaction map with known and predicted protein associations that include direct physical and indirect functional protein linkages, the bioinformatics STRING database [1,2] was used to analyse mass spectrometrically-identified proteins with a changed abundance in *mdx-4cv* skeletal muscles (Tables 1 and 2).

### Interaction map of altered proteins in total *mdx-4cv* skeletal muscle

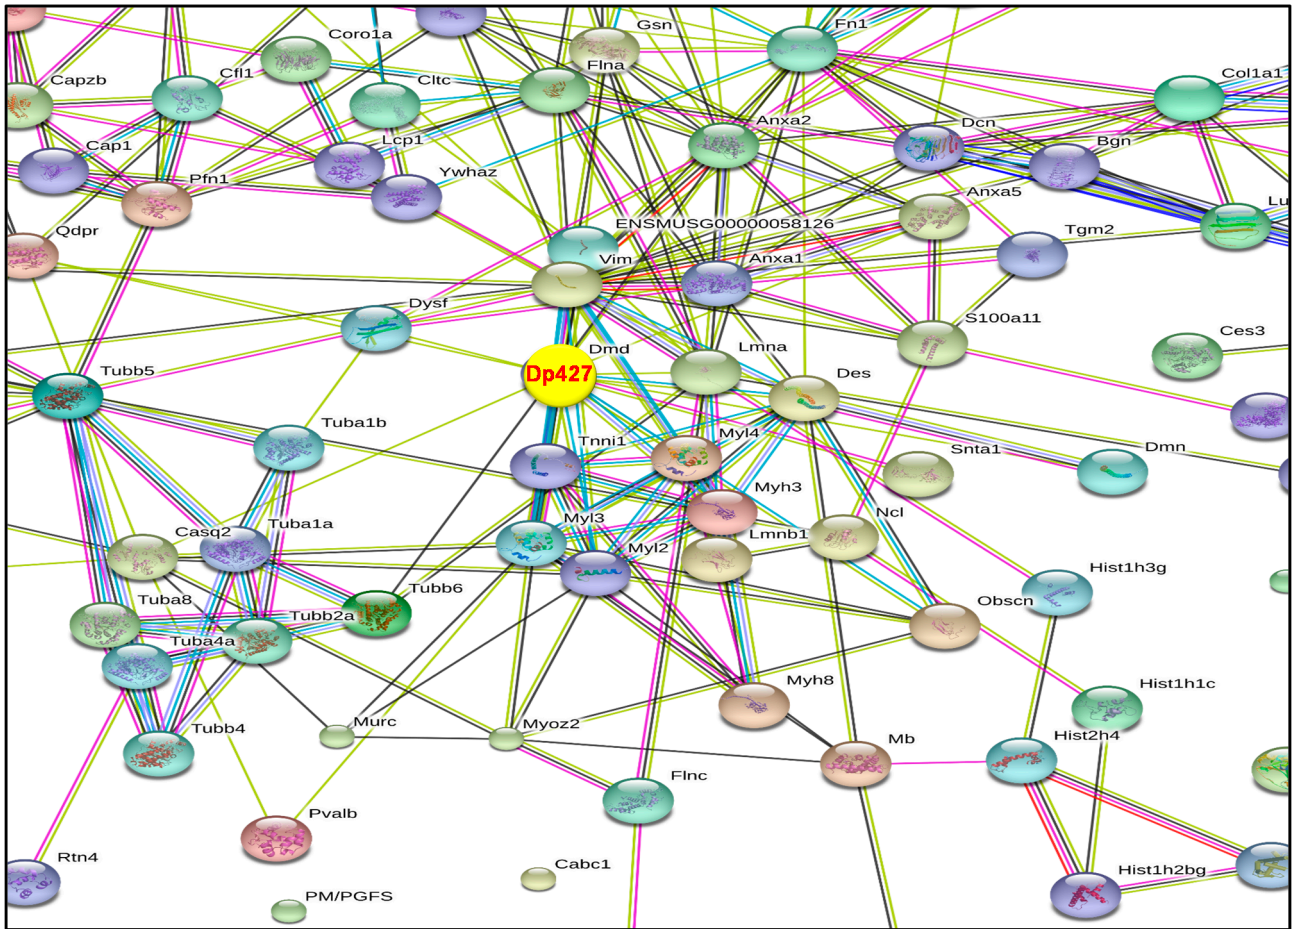

**Figure S2.** Focus of the bioinformatics evaluation of dystrophin isoform Dp427 and its central position in the molecular pathogenesis of X-linked muscular dystrophy. Shown is the middle part of the interaction map of altered muscle-associated proteins from *mdx-4cv* hind limb muscles, focusing on the central position of the dystrophin protein Dp427 (marked in yellow). In order to generate a protein interaction map with known and predicted protein associations that include direct physical and indirect functional protein linkages, the bioinformatics STRING database [1,2] was used to analyse mass spectrometrically-identified proteins with a changed abundance in *mdx-4cv* skeletal muscles (Tables 1 and 2).

**Table S1.** List of identified proteins that exhibit a significantly altered concentration in crude *mdx-4cv* hind limb muscle preparations as revealed by label-free LC-MS/MS analysis. This table contains the statistical *q*-values of the proteins listed in Tables 1 and 2.

| Accession Number | Description                                               | Peptide Count | <i>q</i> Value | Max Fold Change | Highest Mean Condition |
|------------------|-----------------------------------------------------------|---------------|----------------|-----------------|------------------------|
| P09541           | Myosin light chain 4                                      | 7             | 0.0001         | 12.04           | <i>mdx-4cv</i>         |
| P13020           | Gelsolin                                                  | 10            | 0.0005         | 4.18            | <i>mdx-4cv</i>         |
| Q00898           | Alpha-1-antitrypsin 1-5                                   | 5             | 0.0007         | 187.00          | <i>mdx-4cv</i>         |
| Q61879           | Myosin-10                                                 | 2             | 0.0007         | Infinity        | <i>mdx-4cv</i>         |
| Q99JB8           | Protein kinase C and casein kinase II substrate protein 3 | 8             | 0.0015         | 2.10            | <i>mdx-4cv</i>         |
| P11531           | Dystrophin Dp427                                          | 9             | 0.0038         | 14.61           | <i>wt</i>              |
| Q99JY9           | Actin-related protein 3                                   | 3             | 0.0049         | 5.59            | <i>mdx-4cv</i>         |
| Q60854           | Serpin B6                                                 | 13            | 0.0050         | 4.00            | <i>mdx-4cv</i>         |
| Q61233           | Plastin-2                                                 | 6             | 0.0050         | 5.39            | <i>mdx-4cv</i>         |
| Q9D154           | Leukocyte elastase inhibitor A                            | 9             | 0.0052         | 12.59           | <i>mdx-4cv</i>         |
| A2AMM0           | Muscle-related coiled-coil protein                        | 4             | 0.0062         | 4.60            | <i>mdx-4cv</i>         |
| Q70IV5           | Synemin                                                   | 2             | 0.0062         | 2.44            | <i>mdx-4cv</i>         |
| Q8K0E8           | Fibrinogen beta chain                                     | 11            | 0.0062         | 10.97           | <i>mdx-4cv</i>         |
| Q8R5J9           | PRA1 family protein 3                                     | 2             | 0.0062         | 16.11           | <i>mdx-4cv</i>         |
| Q9DAK9           | 14 kDa phosphohistidine phosphatase                       | 2             | 0.0068         | 3.02            | <i>wt</i>              |
| Q9CVB6           | Actin-related protein 2/3 complex subunit 2               | 3             | 0.0068         | 2.92            | <i>mdx-4cv</i>         |
| Q8BVI4           | Dihydropteridine reductase                                | 5             | 0.0068         | 2.91            | <i>wt</i>              |
| Q8VCM7           | Fibrinogen gamma chain                                    | 3             | 0.0069         | 11.00           | <i>mdx-4cv</i>         |
| P48678           | Prelamin-A/C                                              | 25            | 0.0069         | 2.56            | <i>mdx-4cv</i>         |
| Q00623           | Apolipoprotein A-I                                        | 14            | 0.0070         | 4.63            | <i>mdx-4cv</i>         |
| O09161           | Calsequestrin-2                                           | 3             | 0.0070         | 3.87            | <i>mdx-4cv</i>         |
| Q68FD5           | Clathrin heavy chain 1                                    | 10            | 0.0070         | 4.82            | <i>mdx-4cv</i>         |
| P97384           | Annexin A11                                               | 5             | 0.0070         | 2.32            | <i>mdx-4cv</i>         |
| P14152           | Malate dehydrogenase, cytoplasmic                         | 8             | 0.0070         | 2.33            | <i>wt</i>              |
| Q922F4           | Tubulin beta-6 chain                                      | 3             | 0.0079         | 59.01           | <i>mdx-4cv</i>         |
| Q99MQ4           | Asporin                                                   | 5             | 0.0079         | 5.43            | <i>mdx-4cv</i>         |
| P56375           | Acylphosphatase-2                                         | 3             | 0.0079         | 2.40            | <i>wt</i>              |
| P26041           | Moesin                                                    | 5             | 0.0079         | 3.23            | <i>mdx-4cv</i>         |
| P24369           | Peptidyl-prolyl cis-trans isomerase B                     | 2             | 0.0081         | 2.73            | <i>mdx-4cv</i>         |
| P04247           | Myoglobin                                                 | 16            | 0.0084         | 2.93            | <i>wt</i>              |
| P68040           | Guanine nucleotide-binding protein subunit beta-2-like 1  | 6             | 0.0088         | 2.32            | <i>mdx-4cv</i>         |
| P17563           | Selenium-binding protein 1                                | 7             | 0.0089         | 2.36            | <i>wt</i>              |
| P10107           | Annexin A1                                                | 5             | 0.0089         | 4.99            | <i>mdx-4cv</i>         |
| Q8C0M9           | Isoaspartyl peptidase/L-asparaginase                      | 3             | 0.0093         | 3.98            | <i>wt</i>              |
| Q61234           | Alpha-1-syntrophin                                        | 3             | 0.0093         | 3.69            | <i>wt</i>              |
| P07356           | Annexin A2                                                | 9             | 0.0096         | 3.55            | <i>mdx-4cv</i>         |
| Q02788           | Collagen alpha-2(VI) chain                                | 2             | 0.0098         | 44.37           | <i>mdx-4cv</i>         |

Table S1. *Cont.*

| Accession Number | Description                                                          | Peptide Count | <i>q</i> Value | Max Fold Change | Highest Mean Condition |
|------------------|----------------------------------------------------------------------|---------------|----------------|-----------------|------------------------|
| P99024           | Tubulin beta-5 chain                                                 | 4             | 0.0098         | 9.81            | <i>mdx-4cv</i>         |
| Q9D783           | Kelch-like protein 40                                                | 6             | 0.0098         | 3.10            | <i>mdx-4cv</i>         |
| Q9DB60           | Prostamide/prostaglandin F synthase                                  | 2             | 0.0098         | 2.06            | <i>mdx-4cv</i>         |
| Q03265           | ATP synthase subunit alpha, mitochondrial                            | 11            | 0.0098         | 2.10            | <i>mdx-4cv</i>         |
| P26039           | Talin-1                                                              | 3             | 0.0098         | 3.37            | <i>mdx-4cv</i>         |
| Q8R4E4           | Myozenin-3                                                           | 2             | 0.0098         | 2.45            | <i>mdx-4cv</i>         |
| P62874           | Guanine nucleotide-binding protein G(I)/G(S)/G(T) subunit beta-1     | 3             | 0.0107         | 2.68            | <i>mdx-4cv</i>         |
| Q7TMM9           | Tubulin beta-2A chain                                                | 12            | 0.0108         | 2.64            | <i>mdx-4cv</i>         |
| Q91WD5           | NADH dehydrogenase [ubiquinone] iron-sulfur protein 2, mitochondrial | 8             | 0.0108         | 2.32            | <i>mdx-4cv</i>         |
| P31001           | Desmin                                                               | 18            | 0.0108         | 2.09            | <i>mdx-4cv</i>         |
| P40124           | Adenylyl cyclase-associated protein 1                                | 2             | 0.0108         | 2.08            | <i>mdx-4cv</i>         |
| P62141           | Serine/threonine-protein phosphatase PP1-beta catalytic subunit      | 2             | 0.0108         | 2.45            | <i>mdx-4cv</i>         |
| P16015           | Carbonic anhydrase CA3                                               | 21            | 0.0108         | 3.44            | <i>wt</i>              |
| P61027           | Ras-related protein Rab-10                                           | 3             | 0.0108         | 3.12            | <i>mdx-4cv</i>         |
| Q07076           | Annexin A7                                                           | 2             | 0.0108         | 2.47            | <i>mdx-4cv</i>         |
| Q60864           | Stress-induced-phosphoprotein 1                                      | 3             | 0.0117         | 2.01            | <i>wt</i>              |
| P62889           | 60S ribosomal protein L30                                            | 4             | 0.0117         | 2.26            | <i>mdx-4cv</i>         |
| P14733           | Lamin-B1                                                             | 5             | 0.0117         | 2.03            | <i>mdx-4cv</i>         |
| P22752           | Histone H2A type 1                                                   | 4             | 0.0117         | 3.67            | <i>mdx-4cv</i>         |
| Q8VCT4           | Carboxylesterase 1D                                                  | 4             | 0.0117         | 5.85            | <i>wt</i>              |
| P14602           | Heat shock protein beta-1                                            | 6             | 0.0120         | 2.05            | <i>mdx-4cv</i>         |
| Q64105           | Sepiapterin reductase                                                | 7             | 0.0120         | 3.14            | <i>wt</i>              |
| P20152           | Vimentin                                                             | 15            | 0.0124         | 2.42            | <i>mdx-4cv</i>         |
| P97927           | Laminin subunit alpha-4                                              | 3             | 0.0124         | 3.03            | <i>mdx-4cv</i>         |
| O55137           | Acyl-coenzyme A thioesterase 1                                       | 2             | 0.0124         | 4.35            | <i>wt</i>              |
| Q8QZS1           | 3-hydroxyisobutyryl-CoA hydrolase, mitochondrial                     | 3             | 0.0129         | 3.15            | <i>wt</i>              |
| P28665           | Murinoglobulin-1                                                     | 15            | 0.0129         | 6.51            | <i>mdx-4cv</i>         |
| Q9D358           | Low molecular weight phosphotyrosine protein phosphatase             | 2             | 0.0129         | 2.89            | <i>wt</i>              |
| P29621           | Serine protease inhibitor A3C                                        | 2             | 0.0131         | 3.66            | <i>mdx-4cv</i>         |
| P97449           | Aminopeptidase N                                                     | 2             | 0.0131         | 7.80            | <i>mdx-4cv</i>         |
| P11276           | Fibronectin                                                          | 2             | 0.0132         | 271.96          | <i>mdx-4cv</i>         |
| Q91ZJ5           | UTP--glucose-1-phosphate uridylyltransferase                         | 15            | 0.0132         | 2.08            | <i>wt</i>              |
| P50544           | Very long-chain specific acyl-CoA dehydrogenase, mitochondrial       | 3             | 0.0132         | 2.25            | <i>mdx-4cv</i>         |
| Q9EQK5           | Major vault protein                                                  | 2             | 0.0132         | 3.59            | <i>mdx-4cv</i>         |
| P07759           | Serine protease inhibitor A3K                                        | 9             | 0.0132         | 2.65            | <i>mdx-4cv</i>         |

Table S1. *Cont.*

| Accession Number | Description                                         | Peptide Count | <i>q</i> Value | Max Fold Change | Highest Mean Condition |
|------------------|-----------------------------------------------------|---------------|----------------|-----------------|------------------------|
| P14824           | Annexin A6                                          | 5             | 0.0135         | 2.15            | <i>mdx-4cv</i>         |
| P48036           | Annexin A5                                          | 8             | 0.0135         | 2.71            | <i>mdx-4cv</i>         |
| P63017           | Heat shock cognate 71 kDa protein                   | 4             | 0.0135         | 2.03            | <i>wt</i>              |
| Q61207           | Sulfated glycoprotein 1                             | 3             | 0.0135         | 3.14            | <i>mdx-4cv</i>         |
| P70695           | Fructose-1,6-bisphosphatase isozyme 2               | 9             | 0.0135         | 3.09            | <i>wt</i>              |
| Q08642           | Protein-arginine deiminase type-2                   | 10            | 0.0136         | 3.55            | <i>wt</i>              |
| P50543           | Protein S100-A11                                    | 2             | 0.0136         | 2.30            | <i>mdx-4cv</i>         |
| P47757           | F-actin-capping protein subunit beta                | 2             | 0.0138         | 2.34            | <i>mdx-4cv</i>         |
| Q9CQQ7           | ATP synthase F(0) complex subunit B1, mitochondrial | 5             | 0.0142         | 2.55            | <i>mdx-4cv</i>         |
| Q9D6F9           | Tubulin beta-4A chain                               | 7             | 0.0143         | 2.79            | <i>mdx-4cv</i>         |
| Q8BZA9           | Fructose-2,6-bisphosphatase TIGAR                   | 2             | 0.0147         | 2.08            | <i>wt</i>              |
| P22599           | Alpha-1-antitrypsin 1-2                             | 3             | 0.0147         | 3.47            | <i>mdx-4cv</i>         |
| O35129           | Prohibitin-2                                        | 3             | 0.0147         | 2.07            | <i>mdx-4cv</i>         |
| Q3TMP8           | Trimeric intracellular cation channel type A        | 2             | 0.0147         | 8.94            | <i>mdx-4cv</i>         |
| P51881           | ADP/ATP translocase 2                               | 2             | 0.0147         | 8.06            | <i>mdx-4cv</i>         |
| Q9ESD7           | Dysferlin                                           | 2             | 0.0148         | 16.08           | <i>mdx-4cv</i>         |
| P28653           | Biglycan                                            | 4             | 0.0148         | 17.82           | <i>mdx-4cv</i>         |
| A2AAJ9           | Obscurin                                            | 9             | 0.0156         | 2.27            | <i>mdx-4cv</i>         |
| P18760           | Cofilin-1                                           | 5             | 0.0156         | 2.90            | <i>mdx-4cv</i>         |
| O89053           | Coronin-1A                                          | 2             | 0.0156         | 8.10            | <i>mdx-4cv</i>         |
| P08228           | Superoxide dismutase [Cu-Zn]                        | 5             | 0.0156         | 2.09            | <i>wt</i>              |
| P01872           | Ig mu chain C region                                | 3             | 0.0156         | 3.65            | <i>mdx-4cv</i>         |
| Q61838           | Alpha-2-macroglobulin                               | 28            | 0.0156         | 3.79            | <i>mdx-4cv</i>         |
| O88342           | WD repeat-containing protein 1                      | 3             | 0.0156         | 2.05            | <i>mdx-4cv</i>         |
| P32261           | Antithrombin-III                                    | 3             | 0.0157         | 2.66            | <i>mdx-4cv</i>         |
| P70349           | Histidine triad nucleotide-binding protein 1        | 6             | 0.0157         | 2.27            | <i>wt</i>              |
| Q8BK84           | Dual specificity phosphatase DUPD1                  | 2             | 0.0157         | 2.21            | <i>mdx-4cv</i>         |
| Q8BFR5           | Elongation factor Tu, mitochondrial                 | 9             | 0.0158         | 2.37            | <i>mdx-4cv</i>         |
| P62835           | Ras-related protein Rap-1A                          | 2             | 0.0158         | 10.62           | <i>mdx-4cv</i>         |
| P14869           | 60S acidic ribosomal protein P0                     | 3             | 0.0158         | 2.57            | <i>mdx-4cv</i>         |
| P09405           | Nucleolin                                           | 2             | 0.0158         | 2.75            | <i>mdx-4cv</i>         |
| Q9JK53           | Prolargin                                           | 5             | 0.0159         | 2.57            | <i>mdx-4cv</i>         |
| P29391           | Ferritin light chain 1                              | 9             | 0.0164         | 2.68            | <i>mdx-4cv</i>         |
| P06801           | NADP-dependent malic enzyme                         | 8             | 0.0166         | 2.85            | <i>wt</i>              |
| Q8R1G2           | Carboxymethylenebutenolidase homolog                | 4             | 0.0168         | 2.64            | <i>wt</i>              |
| Q61147           | Ceruloplasmin                                       | 2             | 0.0170         | 4.09            | <i>mdx-4cv</i>         |
| Q9WTR5           | Cadherin-13                                         | 3             | 0.0171         | 2.37            | <i>mdx-4cv</i>         |
| P19096           | Fatty acid synthase                                 | 3             | 0.0174         | 4.00            | <i>wt</i>              |
| P68368           | Tubulin alpha-4A chain                              | 3             | 0.0176         | 2.28            | <i>mdx-4cv</i>         |
| P68369           | Tubulin alpha-1A chain                              | 12            | 0.0177         | 3.68            | <i>mdx-4cv</i>         |
| Q6ZWY9           | Histone H2B type 1-C/E/G                            | 3             | 0.0178         | 3.46            | <i>mdx-4cv</i>         |

Table S1. *Cont.*

| Accession Number | Description                                                                    | Peptide Count | <i>q</i> Value | Max Fold Change | Highest Mean Condition |
|------------------|--------------------------------------------------------------------------------|---------------|----------------|-----------------|------------------------|
| Q8BTM8           | Filamin-A                                                                      | 3             | 0.0180         | 2.98            | <i>mdx-4cv</i>         |
| P16546           | Spectrin alpha chain, non-erythrocytic 1                                       | 5             | 0.0186         | 3.75            | <i>mdx-4cv</i>         |
| P63101           | 14-3-3 protein zeta/delta                                                      | 4             | 0.0186         | 2.23            | <i>mdx-4cv</i>         |
| Q8CI43           | Myosin light chain 6B                                                          | 2             | 0.0196         | 2.89            | <i>mdx-4cv</i>         |
| Q99P72           | Reticulon-4                                                                    | 2             | 0.0196         | 3.96            | <i>mdx-4cv</i>         |
| Q9D0S9           | Histidine triad nucleotide-binding protein 2, mitochondrial                    | 2             | 0.0199         | 2.15            | <i>wt</i>              |
| P18826           | Phosphorylase b kinase regulatory subunit alpha, skeletal muscle isoform       | 3             | 0.0200         | 3.35            | <i>mdx-4cv</i>         |
| A2AUC9           | Kelch-like protein 41                                                          | 12            | 0.0201         | 2.97            | <i>mdx-4cv</i>         |
| Q9CRB9           | Coiled-coil-helix-coiled-coil-helix domain-containing protein 3, mitochondrial | 2             | 0.0202         | 2.28            | <i>wt</i>              |
| Q8VDD5           | Myosin-9                                                                       | 4             | 0.0213         | 15.76           | <i>mdx-4cv</i>         |
| E9PZQ0           | Ryanodine receptor 1                                                           | 27            | 0.0213         | 3.72            | <i>mdx-4cv</i>         |
| Q9CQR4           | Acyl-coenzyme A thioesterase 13                                                | 2             | 0.0220         | 2.14            | <i>wt</i>              |
| Q9D1G3           | Protein-cysteine N-palmitoyltransferase HHAT-like protein                      | 5             | 0.0221         | 6.55            | <i>mdx-4cv</i>         |
| O89104           | Synaptophysin-like protein 2                                                   | 2             | 0.0222         | 3.73            | <i>mdx-4cv</i>         |
| Q9D0K2           | Succinyl-CoA:3-ketoacid coenzyme A transferase 1, mitochondrial                | 2             | 0.0222         | 2.61            | <i>wt</i>              |
| Q9DB20           | ATP synthase subunit O, mitochondrial                                          | 4             | 0.0226         | 2.19            | <i>mdx-4cv</i>         |
| Q60605           | Myosin light polypeptide 6                                                     | 5             | 0.0227         | 2.10            | <i>mdx-4cv</i>         |
| P62806           | Histone H4                                                                     | 5             | 0.0227         | 3.28            | <i>mdx-4cv</i>         |
| P14094           | Sodium/potassium-transporting ATPase subunit beta-1                            | 2             | 0.0227         | 4.39            | <i>mdx-4cv</i>         |
| Q6PIE5           | Sodium/potassium-transporting ATPase subunit alpha-2                           | 6             | 0.0229         | 5.02            | <i>mdx-4cv</i>         |
| P15864           | Histone H1.2                                                                   | 2             | 0.0230         | 3.28            | <i>mdx-4cv</i>         |
| P47911           | 60S ribosomal protein L6                                                       | 2             | 0.0232         | 2.59            | <i>mdx-4cv</i>         |
| P11404           | Fatty acid-binding protein FABP3, heart                                        | 5             | 0.0232         | 2.21            | <i>wt</i>              |
| Q8BMS1           | Trifunctional enzyme subunit alpha, mitochondrial                              | 9             | 0.0232         | 3.25            | <i>mdx-4cv</i>         |
| O08532           | Voltage-dependent calcium channel subunit alpha-2/delta-1                      | 5             | 0.0235         | 3.03            | <i>mdx-4cv</i>         |
| P68433           | Histone H3.1                                                                   | 3             | 0.0235         | 5.98            | <i>mdx-4cv</i>         |
| Q91V79           | Fat storage-inducing transmembrane protein 1                                   | 2             | 0.0241         | 5.15            | <i>mdx-4cv</i>         |
| Q61425           | Hydroxyacyl-coenzyme A dehydrogenase, mitochondrial                            | 2             | 0.0244         | 2.30            | <i>mdx-4cv</i>         |
| P14148           | 60S ribosomal protein L7                                                       | 3             | 0.0250         | 3.23            | <i>mdx-4cv</i>         |
| P15327           | Bisphosphoglycerate mutase                                                     | 3             | 0.0250         | 2.02            | <i>wt</i>              |
| Q61292           | Laminin subunit beta-2                                                         | 5             | 0.0250         | 2.08            | <i>mdx-4cv</i>         |
| Q91VI7           | Ribonuclease inhibitor                                                         | 7             | 0.0250         | 2.49            | <i>mdx-4cv</i>         |
| P13542           | Myosin-8                                                                       | 4             | 0.0255         | 8.63            | <i>mdx-4cv</i>         |

Table S1. *Cont.*

| Accession Number | Description                                                                 | Peptide Count | <i>q</i> Value | Max Fold Change | Highest Mean Condition |
|------------------|-----------------------------------------------------------------------------|---------------|----------------|-----------------|------------------------|
| Q8BH59           | Calcium-binding mitochondrial carrier protein Aralar1                       | 7             | 0.0256         | 3.91            | <i>mdx-4cv</i>         |
| P07758           | Alpha-1-antitrypsin 1-1                                                     | 9             | 0.0256         | 2.94            | <i>mdx-4cv</i>         |
| Q9DC69           | NADH dehydrogenase [ubiquinone] 1 alpha subcomplex subunit 9, mitochondrial | 3             | 0.0257         | 2.26            | <i>mdx-4cv</i>         |
| O55103           | Periaxin                                                                    | 2             | 0.0259         | 2.67            | <i>wt</i>              |
| Q9CZU6           | Citrate synthase, mitochondrial                                             | 5             | 0.0261         | 2.07            | <i>mdx-4cv</i>         |
| Q8VEM8           | Phosphate carrier protein, mitochondrial                                    | 5             | 0.0261         | 3.22            | <i>mdx-4cv</i>         |
| Q8VDN2           | Sodium/potassium-transporting ATPase subunit alpha-1                        | 5             | 0.0262         | 6.07            | <i>mdx-4cv</i>         |
| P00405           | Cytochrome c oxidase subunit 2                                              | 3             | 0.0265         | 3.52            | <i>mdx-4cv</i>         |
| P62962           | Profilin-1                                                                  | 4             | 0.0265         | 2.49            | <i>mdx-4cv</i>         |
| P62908           | 40S ribosomal protein S3                                                    | 3             | 0.0265         | 4.16            | <i>mdx-4cv</i>         |
| P09542           | Myosin light chain 3                                                        | 8             | 0.0267         | 3.51            | <i>wt</i>              |
| P05213           | Tubulin alpha-1B chain                                                      | 2             | 0.0267         | 2.30            | <i>mdx-4cv</i>         |
| Q62000           | Mimecan                                                                     | 7             | 0.0267         | 2.42            | <i>mdx-4cv</i>         |
| Q01339           | Beta-2-glycoprotein 1                                                       | 3             | 0.0269         | 4.11            | <i>mdx-4cv</i>         |
| P11087           | Collagen alpha-1(I) chain                                                   | 4             | 0.0271         | 5.92            | <i>mdx-4cv</i>         |
| P28654           | Decorin                                                                     | 5             | 0.0271         | 3.10            | <i>mdx-4cv</i>         |
| Q9JJW5           | Myozenin-2                                                                  | 2             | 0.0271         | 3.98            | <i>wt</i>              |
| Q91X72           | Hemopexin                                                                   | 13            | 0.0273         | 2.58            | <i>mdx-4cv</i>         |
| P48962           | ADP/ATP translocase 1                                                       | 9             | 0.0274         | 2.86            | <i>mdx-4cv</i>         |
| P97823           | Acyl-protein thioesterase 1                                                 | 2             | 0.0274         | 3.96            | <i>wt</i>              |
| Q9DBG6           | Dolichyl-diphosphooligosaccharide-protein glycosyltransferase subunit 2     | 2             | 0.0277         | 4.26            | <i>mdx-4cv</i>         |
| Q04857           | Collagen alpha-1(VI) chain                                                  | 3             | 0.0278         | 3.12            | <i>mdx-4cv</i>         |
| P13541           | Myosin-3                                                                    | 6             | 0.0278         | 2.71            | <i>mdx-4cv</i>         |
| P35980           | 60S ribosomal protein L18                                                   | 3             | 0.0279         | 2.42            | <i>mdx-4cv</i>         |
| P20918           | Plasminogen                                                                 | 2             | 0.0281         | 3.89            | <i>mdx-4cv</i>         |
| Q6ZWX6           | Eukaryotic translation initiation factor 2 subunit 1                        | 2             | 0.0282         | 2.28            | <i>mdx-4cv</i>         |
| P03921           | NADH-ubiquinone oxidoreductase chain 5                                      | 3             | 0.0285         | 6.28            | <i>mdx-4cv</i>         |
| Q9Z1E4           | Glycogen [starch] synthase, muscle                                          | 4             | 0.0291         | 2.33            | <i>mdx-4cv</i>         |
| P15626           | Glutathione S-transferase Mu 2                                              | 5             | 0.0291         | 2.13            | <i>wt</i>              |
| Q8R429           | Sarcoplasmic/endoplasmic reticulum calcium ATPase 1                         | 39            | 0.0294         | 2.78            | <i>mdx-4cv</i>         |
| P41216           | Long-chain-fatty-acid-CoA ligase 1                                          | 5             | 0.0296         | 5.19            | <i>mdx-4cv</i>         |
| P35979           | 60S ribosomal protein L12                                                   | 3             | 0.0296         | 2.02            | <i>mdx-4cv</i>         |
| Q3MI48           | Junctional sarcoplasmic reticulum protein 1                                 | 3             | 0.0305         | 2.18            | <i>mdx-4cv</i>         |
| P51885           | Lumican                                                                     | 5             | 0.0305         | 2.07            | <i>mdx-4cv</i>         |
| P47963           | 60S ribosomal protein L13                                                   | 2             | 0.0325         | 2.31            | <i>mdx-4cv</i>         |
| P21981           | Protein-glutamine gamma-glutamyltransferase 2                               | 2             | 0.0325         | 8.77            | <i>mdx-4cv</i>         |
| Q9JJZ2           | Tubulin alpha-8 chain                                                       | 2             | 0.0328         | 2.10            | <i>mdx-4cv</i>         |

Table S1. *Cont.*

| Accession Number | Description                                                         | Peptide Count | <i>q</i> Value | Max Fold Change | Highest Mean Condition |
|------------------|---------------------------------------------------------------------|---------------|----------------|-----------------|------------------------|
| P21107           | Tropomyosin alpha-3 chain                                           | 3             | 0.0333         | 2.72            | <i>wt</i>              |
| Q71LX4           | Talin-2                                                             | 2             | 0.0333         | 3.69            | <i>mdx-4cv</i>         |
| Q9CZM2           | 60S ribosomal protein L15                                           | 2             | 0.0335         | 2.52            | <i>mdx-4cv</i>         |
| Q9DBB8           | Trans-1,2-dihydrobenzene-1,2-diol dehydrogenase                     | 2             | 0.0348         | 2.90            | <i>wt</i>              |
| Q60936           | Chaperone activity of bc1 complex-like, mitochondrial               | 2             | 0.0367         | 2.02            | <i>mdx-4cv</i>         |
| Q01768           | Nucleoside diphosphate kinase B                                     | 3             | 0.0377         | 2.21            | <i>wt</i>              |
| P51667           | Myosin regulatory light chain 2, ventricular/cardiac muscle isoform | 6             | 0.0377         | 3.64            | <i>wt</i>              |
| Q02053           | Ubiquitin-like modifier-activating enzyme 1                         | 2             | 0.0388         | 2.01            | <i>mdx-4cv</i>         |
| Q9CR62           | Mitochondrial 2-oxoglutarate/malate carrier protein                 | 2             | 0.0392         | 4.60            | <i>mdx-4cv</i>         |
| Q9WUZ5           | Troponin I, slow skeletal muscle                                    | 2             | 0.0403         | 2.50            | <i>wt</i>              |
| Q6ZWV3           | 60S ribosomal protein L10                                           | 2             | 0.0424         | 4.12            | <i>mdx-4cv</i>         |
| Q7TSH2           | Phosphorylase b kinase regulatory subunit beta                      | 2             | 0.0425         | 5.50            | <i>mdx-4cv</i>         |
| Q8VHX6           | Filamin-C                                                           | 20            | 0.0444         | 2.07            | <i>mdx-4cv</i>         |
| P32848           | Parvalbumin alpha                                                   | 5             | 0.0457         | 3.95            | <i>wt</i>              |
| Q8BG05           | Heterogeneous nuclear ribonucleoprotein A3                          | 2             | 0.0458         | 2.28            | <i>mdx-4cv</i>         |
| Q60930           | Voltage-dependent anion-selective channel protein 2                 | 9             | 0.0460         | 2.37            | <i>mdx-4cv</i>         |

## Reference

1. STRING Functional Protein Association Network. Available online: <http://string-db.org/> (accessed on 3 February 2015).
2. Franceschini, A.; Szklarczyk, D.; Frankild, S.; Kuhn, M.; Simonovic, M.; Roth, A.; Lin, J.; Minguez, P.; Bork, P.; von Mering, C.; *et al.* STRING v9.1: Protein-protein interaction networks, with increased coverage and integration. *Nucleic Acids Res.* **2013**, *41*, D808–D815.
